# Supplementary material for: Seasonal upwelling–dust controls on export production in the Canary Current System revealed by Lagrangian particle tracking
Source: Copernicus journal article supplement (doi:10.5194/egusphere-2025-5789), 2025-12-11
Supplement: Supplementary file 1 [file egusphere-2025-5789-supplement.pdf]

# Supplementary Material

EGUSPHERE-2025-5789 | Research article | Registered on 20 Nov 2025

**Guerreiro, C.V. et al.** Seasonal upwelling–dust controls on export production in the Canary Current System revealed by Lagrangian particle tracking

*Correspondence to:* Catarina V. Guerreiro (cataguerreiro@fc.ul.pt)

**Abstract.** The Canary Current System (CCS) is a major eastern boundary upwelling system where intense nearshore productivity, dynamic offshore transport, and Saharan dust deposition jointly shape biogeochemical cycling. Understanding how these physical and atmospheric forcings regulate particulate export is crucial for assessing the biological carbon pump under ongoing North Atlantic warming. Here we combine Lagrangian backtracking of satellite-derived chlorophyll-a (Chl-a), particulate inorganic carbon (PIC), and primary production (PP) with one year of sediment trap fluxes from Cape Blanc (CB) and M1, integrating lithogenic, organic, and coccolith species export with satellite-based upwelling, sea surface height (SSH), aerosol optical depth (AOD), and in situ water-column observations.

The results reveal strong seasonal connectivity between coastal upwelling, offshore transport, and deep export. Late winter–spring intensification of mixing, upwelling, and filament/eddy activity sustained elevated Chl-a, PP, PIC, and high  $\text{CaCO}_3$  fluxes, with sinking assemblages dominated by fast-blooming placolith-bearing coccolithophores –especially at CB. Lagrangian trajectories further show that this connectivity weakens offshore, with strong coast-to-open-ocean declines in Chl-a, PP, and PIC – particularly along pathways to M1 – highlighting reduced cross-shelf transfer and a stronger yearlong influence of stratified tropical waters at that site.

During summer–autumn, weakened upwelling and intrusions of warm Mauritanian Current waters reduced surface productivity at both traps, yet deep organic matter export remained high – most prominently at CB and even at the persistently oligotrophic M1. Across this period, elevated Saharan dust deposition coincided with enhanced particle fluxes. Multivariate statistical analyses show strong negative correlations between dust and all upper photic zone (UPZ) productivity indicators, and positive associations with warm, stratified conditions dominated by tropical, non-blooming lower photic zone (LPZ) taxa typical – suggesting that mineral ballasting was as the dominant seasonal dust effect. At CB, where summer cross-shelf transfer weakened, the persistence of high export under low surface Chl-a suggests that lateral and subsurface supply of previously produced organic matter played a major role, with Saharan dust further enhancing its downward transfer through mineral ballasting.

Nonetheless, several dust-associated export pulses also displayed increases in coccolith UPZ/LPZ ratios, suggesting episodic fertilisation responses by fast-blooming taxa superimposed on a predominantly ballasting-driven regime. Importantly, dust contributed under both windy, high-productivity late winter–spring conditions and during the stratified summer–autumn phase, sustaining downward particle flux even when local surface productivity was low. The weak relationship between AOD and measured dust flux reflects cloud-induced suppression of satellite AOD retrievals during wet deposition rather than reduced dust deposition.

Altogether, these results demonstrate a dual physical–atmospheric control on export in the central–southern CCS. Upwelling and cross-shelf transport fuel the winter–spring  $\text{CaCO}_3$ -rich export regime, whereas Saharan dust plays a particularly important role in maintaining organic-matter fluxes under summer–autumn stratification through ballasting, with secondary episodic fertilisation. These findings contribute to refine the mechanistic understanding of coast-to-ocean and vertical export pathways and help constrain how dust–upwelling interactions will shape the biological carbon pump under future climate forcing.

**Table S1 – Sources of satellite-driven Earth Observation time-series data processed for the sediment-trap deployment period at CB and M1 and for the Lagrangian analysis.**

| Parameter                   | Acronym       | Units                                | Sensor       | Product  | Resolution     | Source                                                                                                                                                                                                                                                                            | Reference                                                                                                                                                                                          |
|-----------------------------|---------------|--------------------------------------|--------------|----------|----------------|-----------------------------------------------------------------------------------------------------------------------------------------------------------------------------------------------------------------------------------------------------------------------------------|----------------------------------------------------------------------------------------------------------------------------------------------------------------------------------------------------|
| Chlorophyll                 | Chl- <i>a</i> | mg m <sup>-3</sup>                   | OC-CCI       | V6-daily | 4 km           | <a href="https://www.oceancolour.org">https://www.oceancolour.org</a>                                                                                                                                                                                                             | Sathyendranath et al. (2019)                                                                                                                                                                       |
| Primary Production          | PP            | mg C m <sup>-2</sup> d <sup>-1</sup> | Multisensor  | daily    | 4km            | <a href="https://primus.eofrom.space/">https://primus.eofrom.space/</a>                                                                                                                                                                                                           | Smyth et al. 2005                                                                                                                                                                                  |
| Particle Inorganic Carbon   | PIC           | mol m <sup>-3</sup>                  | MODIS-Aqua   | L3-daily | 4km            | <a href="https://oceancolor.gsfc.nasa.gov/cgi/l3">https://oceancolor.gsfc.nasa.gov/cgi/l3</a>                                                                                                                                                                                     | Gordon et al., 2001; Balch et al., 2005 ; Hopkins et al., 2015                                                                                                                                     |
| Sea Surface Temperature     | SST           | °C                                   | OSTIA        | L4-daily | 0.05°          | <a href="https://doi.org/10.48670/moi-00168">https://doi.org/10.48670/moi-00168</a>                                                                                                                                                                                               | Good et al. (2020), Worsfold et al. (2024)                                                                                                                                                         |
| Daily Precipitation         | DPP           | mm day <sup>-1</sup>                 | multiple     | L3-daily | 0.25°          | <a href="https://disc.gsfc.nasa.gov/datasets/TRMM_3B42RT_Daily_7/summary">https://disc.gsfc.nasa.gov/datasets/TRMM_3B42RT_Daily_7/summary</a>                                                                                                                                     | Goddard Earth Sciences Data and Information Services Center (2016); Huffman et al. (2007); Xie and Arkin (1997)                                                                                    |
| Mixed Layer Depth           | MLD           | m                                    | NOBM (model) | daily    | 0.67x1.25°     | <a href="https://catalog.data.gov/dataset/nasa-ocean-biogeochemical-model-assimilating-satellite-chlorophyll-data-global-monthly-vr2-5b906">https://catalog.data.gov/dataset/nasa-ocean-biogeochemical-model-assimilating-satellite-chlorophyll-data-global-monthly-vr2-5b906</a> | Gregg and Rousseaux, (2017)                                                                                                                                                                        |
| Aerosol Optical Depth (865) | AOD           | unitless                             | Multisensor  | daily    | 4km            | <a href="#">GlobColour - Home</a>                                                                                                                                                                                                                                                 | Gordon, 1997                                                                                                                                                                                       |
| Upwelling Index             | UI            | K                                    | OSTIA SST    | daily    | 0.051°         | <a href="https://primus.eofrom.space/">https://primus.eofrom.space/</a>                                                                                                                                                                                                           | N/A                                                                                                                                                                                                |
| Sea Surface Height          | SSH           | m                                    | Multiple     | daily    | 0.125 x 0.125° | <a href="https://doi.org/10.48670/moi-00148">https://doi.org/10.48670/moi-00148</a>                                                                                                                                                                                               | Global Ocean Gridded L 4 Sea Surface Heights And Derived Variables Reprocessed 1993 Ongoing. E.U. Copernicus Marine Service Information (CMEMS). Marine Data Store (MDS). DOI: 10.48670/ moi-00148 |

**Table S2. Annual means and ranges of fluxes and relative contributions of major coccolith taxa, CaCO<sub>3</sub>, organic matter, bSiO<sub>2</sub>, and lithogenic fractions measured in situ from sediment traps M1 and CB along with environmental time-series data from satellite remote sensing at both trap mooring sites (particle flux data from Korte et al., 2017; Guerreiro et al., 2019, 2021).**

| Coccolith Sinking Taxa                                         | M1 (12°N/23°W)                                                        |          |                 |         | CB (21°N/20°W)                                                        |          |                 |         |
|----------------------------------------------------------------|-----------------------------------------------------------------------|----------|-----------------|---------|-----------------------------------------------------------------------|----------|-----------------|---------|
|                                                                | Fluxes (coccoliths m <sup>-2</sup> d <sup>-1</sup> *10 <sup>7</sup> ) |          | Percentages (%) |         | Fluxes (coccoliths m <sup>-2</sup> d <sup>-1</sup> *10 <sup>7</sup> ) |          | Percentages (%) |         |
|                                                                | Mean                                                                  | Min-Max  | Mean            | Min-Max | Mean                                                                  | Min-Max  | Mean            | Min-Max |
| <i>Emiliania huxleyi</i>                                       | 8                                                                     | 3 - 16   | 16              | 8 - 21  | 29                                                                    | 2 - 99   | 34              | 15 - 51 |
| <i>Gephyrocapsa</i> spp.                                       | 4                                                                     | 1 - 8    | 9               | 5 - 19  | 7                                                                     | 3 - 16   | 13              | 4 - 29  |
| <i>Calcidiscus leptoporus</i>                                  | 1                                                                     | 0.1 - 8  | 1               | 0.4 - 3 | 3                                                                     | 0.4 - 12 | 4               | 2 - 8   |
| <i>Helicosphaera</i> spp.                                      | 4                                                                     | 1 - 8    | 8               | 6 - 12  | 2                                                                     | 0.2 - 8  | 2               | 1 - 4   |
| <i>Rhabdosphaera</i> spp. & <i>Umbellosphaera</i> spp.         | 3                                                                     | 0.3 - 8  | 6               | 1 - 10  | 4                                                                     | 0.3 - 20 | 5               | 2 - 14  |
| <i>Florisphaera profunda</i> & <i>Gladiolithus flabellatus</i> | 23                                                                    | 10 - 42  | 48              | 39 - 56 | 19                                                                    | 5 - 50   | 26              | 14 - 35 |
| <i>Umbilicosphaera</i> spp.                                    | 2                                                                     | 0.6 - 6  | 5               | 1 - 8   | 4                                                                     | 1 - 12   | 5               | 3 - 8   |
| Other taxa                                                     | 4                                                                     | 2 - 9    | 8               | 5 - 14  | 10                                                                    | 1 - 33   | 12              | 6 - 21  |
| Total                                                          | 50                                                                    | 21 - 91  |                 |         | 79                                                                    | 15 - 215 |                 |         |
| Sediment Bulk Composition                                      | Fluxes (mg m <sup>-2</sup> d <sup>-1</sup> *10 <sup>7</sup> )         |          | Percentages (%) |         | Fluxes (mg m <sup>-2</sup> d <sup>-1</sup> *10 <sup>7</sup> )         |          | Percentages (%) |         |
|                                                                | Mean                                                                  | Min-Max  | Mean            | Min-Max | Mean                                                                  | Min-Max  | Mean            | Min-Max |
| CaCO <sub>3</sub>                                              | 38                                                                    | 23 - 85  | 34              | 21 - 45 | 92                                                                    | 3 - 297  | 57              | 27 - 83 |
| Organic matter                                                 | 15                                                                    | 10 - 28  | 10              | 8 - 13  | 17                                                                    | 2 - 35   | 13              | 6 - 29  |
| bSiO <sub>2</sub>                                              | 11                                                                    | 6 - 17   | 14              | 11 - 17 | 5                                                                     | 0.1 - 20 | 4               | 1 - 12  |
| Lithogenic flyx (unspecified*)                                 | 48                                                                    | 33 - 71  | 43              | 30 - 58 | 38                                                                    | 1 - 114  | 27              | 5 - 58  |
| Total Mass                                                     | 112                                                                   | 77 - 200 |                 |         | 150                                                                   | 6 - 423  |                 |         |
| Satellite-driven Parameters                                    | Mean                                                                  |          | Min-Max         |         | Mean                                                                  |          | Min-Max         |         |
|                                                                |                                                                       |          |                 |         |                                                                       |          |                 |         |
| Aerosol Optical Depth (AOD 865, unitless)                      | 0.17                                                                  |          | 0.1 - 0.2       |         | 0.14                                                                  |          | 0.1 - 0.25      |         |
| Daily Precipitation (mm/d)                                     | 2.6                                                                   |          | 0 - 11          |         | 0.2                                                                   |          | 0 - 2           |         |
| Sea Surface Temperature (SST, °C)                              | 26                                                                    |          | 24 - 29         |         | 22                                                                    |          | 18 - 26         |         |
| Mixed Layer Depth (MLD, m)                                     | 23                                                                    |          | 11 - 35         |         | 45                                                                    |          | 20 - 73         |         |
| Chlorophyll-a (Chl-a, µg/L)                                    | 0.16                                                                  |          | 0.13 - 0.2      |         | 0.62                                                                  |          | 0.3 - 1.5       |         |
| Particulate Inorganic Carbon (PIC, mol/L*10 <sup>-8</sup> )    | 2                                                                     |          | 1.2 - 6         |         | 8                                                                     |          | 0 - 32          |         |
| Primary Production (PP, mg C/m <sup>2</sup> /d)                | 722                                                                   |          | 603 - 885       |         | 1145                                                                  |          | 674 - 2335      |         |

## References

Brown, O. B. and Minnett, P. J.: MODIS Infrared Sea Surface Temperature Algorithm – Algorithm Theoretical Basis Document, University of Miami, Miami, FL, 91p., 1999.

Frouin, R., Franz, B. A., Werdell, P. J., 2003. The SeaWiFS PAR product., In: S.B. Hooker and E.R. Firestone, Algorithm Updates for the Fourth SeaWiFS Data Reprocessing, NASA Tech. Memo. 2003–206892, Volume 22, NASA Goddard Space Flight Center, Greenbelt, Maryland, 46-50. The SeaWiFS PAR product.

Goddard Earth Sciences Data and Information Services Center (2016), TRMM (TMPA-RT) Near Real-Time Precipitation L3 1 day 0.25 degree x 0.25 degree V7, Greenbelt, MD, Goddard Earth Sciences Data and Information Services Center (GES DISC), Accessed [11/11/2016] [http://disc.gsfc.nasa.gov/datacollection/TRMM\\_3B42RT\\_Daily\\_7.html](http://disc.gsfc.nasa.gov/datacollection/TRMM_3B42RT_Daily_7.html)

Good, S.; Fiedler, E.; Mao, C.; Martin, M.J.; Maycock, A.; Reid, R.; Roberts-Jones, J.; Searle, T.; Waters, J.; While, J.; Worsfold, M. The Current Configuration of the OSTIA System for Operational Production of Foundation Sea Surface Temperature and Ice Concentration Analyses. Remote Sens. 2020, 12, 720. doi: 10.3390/rs12040720

Gordon, H.R., 1997. Atmospheric correction of ocean color imagery in the Earth Observing System era. Journal of Geophysical Research - Atmospheres 102 (D14), 17081-17106

Gregg, W., Rousseaux, C., 2017. NASA Ocean Biogeochemical Model assimilating satellite chlorophyll data global daily VR2017, Edited by Watson Gregg and Cecile Rousseaux, Greenbelt, MD, USA, Goddard Earth Sciences Data and Information Services Center (GES DISC), Accessed: [Data Access Date], 10.5067/PT6TXZKSHBW9

Hu, C., Lee, Z., and Franz, B. A.: Chlorophyll-a algorithms for oligotrophic oceans: a novel approach based on three-band reflectance difference, *J. Geophys. Res.*, 117, C01011TS34, 2012, doi:10.1029/2011JC007395

Huffman, G.J., Adler, R.F., Bolvin, D.T., Gu, G., Nelkin, E.J., Bowman, K.P., Hong, Y., Stocker, E.F., Wolff, D.B., 2007. The TRMM Multi-satellite Precipitation Analysis: Quasi- Global, Multi-Year, Combined-Sensor Precipitation Estimates at Fine Scale. *J. Hydrometeor.* 8 (1), 38-55.

Lee, T., Lagerloef, G., Gierach, M.M., Kao, H.-Y., Yueh, S., Dohan, K., 2012. Aquarius reveals salinity structure of tropical instability waves, *Geophys. Res. Lett.*, 39, L12610.

Levy, R., Hsu, C., et al., 2015. MODIS Atmosphere L2 Aerosol Product. NASA MODIS Adaptive Processing System, Goddard Space Flight Center, USA ([http://dx.doi.org/10.5067/MODIS/MYD04\\_L2.006](http://dx.doi.org/10.5067/MODIS/MYD04_L2.006)).

NASA Aquarius project. 2015a. Aquarius Official Release Level 3 Sea Surface Salinity Standard Mapped Image Daily Data V4.0. Ver. 4.0. PO.DAAC, CA, USA.

NASA Aquarius project. 2015b. Aquarius Official Release Level 3 Wind Speed Standard Mapped Image Daily Data V4.0. Ver. 4.0. PO.DAAC, CA, USA.

Sathyendranath, S., Brewin, R. J. W., Brockmann, C., Brotas, V., Calton, B., Chuprin, A., Cipollini, P., Couto, A. B., Dingle, J., Doerffer, R., Donlon, C., Dowell, M., Farman, A., Grant, M., Groom, S., Horseman, A., Jackson, T., Krasemann, H., Lavender, S., ... Platt, T. (2019). An Ocean-Colour Time Series for Use in Climate Studies: The Experience of the Ocean-Colour Climate Change Initiative (OC-CCI). *Sensors*, 19(19), 4285. <https://doi.org/10.3390/s19194285>

Smyth, T. J., G. H. Tilstone, and S. B. Groom (2005), Integration of radiative transfer into satellite models of ocean primary production, *J. Geophys. Res.*, 110, C10014, doi:10.1029/2004JC002784.

Worsfold, M.; Good, S.; Atkinson, C.; Embury, O. Presenting a Long-Term, Reprocessed Dataset of Global Sea Surface Temperature Produced Using the OSTIA System. *Remote Sens.* 2024, 16, 3358. <https://doi.org/10.3390/rs16183358>

Xie, P., Arkin, P.A., 1997. Global precipitation: A 17-year monthly analysis based on gauge observations, satellite estimates, and numerical model outputs. *Bull. Am. Meteor. Soc.*, 78, 2539 – 25.
